# Supplementary material
Source: PubMed Central journal article supplement (PMC2711300)
Supplement: mmc1.pdf [file mmc1.pdf]

Biophysical Journal, Volume 96

**Supporting Material**

**Assessment of SR  $\text{Ca}^{2+}$  depletion during spontaneous  $\text{Ca}^{2+}$  waves in isolated permeabilised rabbit ventricular cardiomyocytes.**

N MacQuaide, J Dempster, and GL Smith

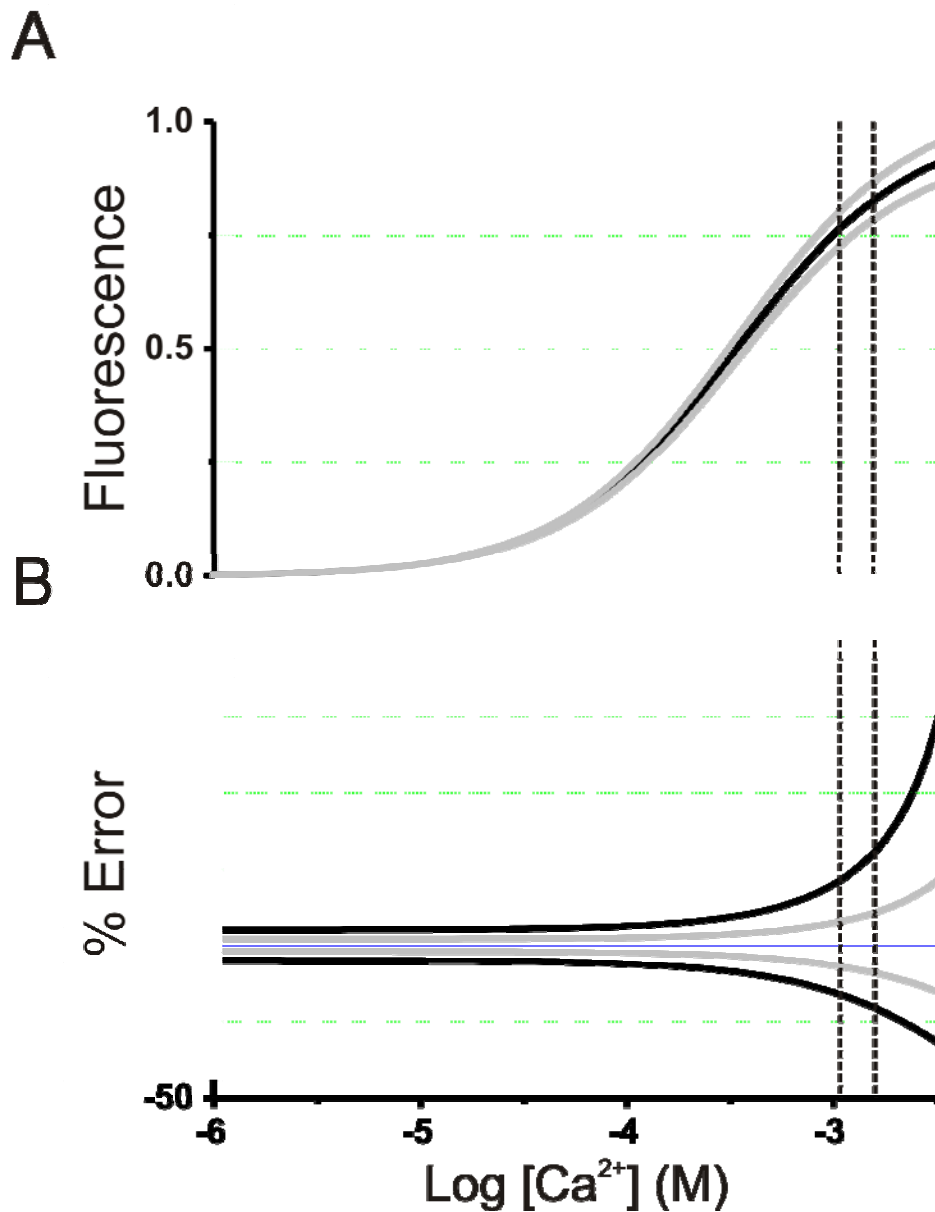

**Figure S1. % error in [Ca<sup>2+</sup>] calculation based on affinity of Fluo-5N with 2 and 5% error in fluorescence measurement.**

Panel A, solid black line is the relationship between [Ca<sup>2+</sup>] and fluorescence +/-5% (grey lines).

Panel B, the effect of a +/-5 (solid lines) and 2% (grey lines) error in detection of fluorescence cause to calculation of [Ca<sup>2+</sup>] based on a  $K_d$  of 0.4 mM. Dotted vertical lines indicate resting

SR  $[Ca^{2+}]$  in control cells (1.1 mM) and those exposed to 50 $\mu$ M tetracaine (1.6 mM). This indicates that error in measurement is ~2.5 times higher at 1.6 than at 1.1 mM.
